# Supplementary material for: How Does Industrial Digitalization Affect Enterprise Environmental Performance?
Source: Research Square preprint supplement (doi:10.21203/rs.3.rs-310270/v1), 2021-03-30
Supplement: Supplementary file 1 [file 4f39a87a41b834a868d6f9ac.docx]

### Appendix

**Table A. Descriptive statistics of variables**

|  | Variable | Obs. | Mean | Std. Dev. | Min | Max |
| --- | --- | --- | --- | --- | --- | --- |
| Dependent  variables | *COD Intensity* | 455,558 | 3.4575 | 8.1912 | 0.0000 | 32.7958 |
| *SO2 Intensity* | 455,584 | 9.9004 | 19.5631 | 0.0000 | 74.5600 |
| *Sewage Intensity* | 455,558 | 27.6416 | 52.3837 | 0.0000 | 202.1410 |
| *LnCOD* | 455,561 | 5.1982 | 4.1747 | 0.0000 | 11.7118 |
| *COD Production* | 429,614 | 5.5363 | 14.6244 | 0.0000 | 99.9991 |
| *COD Disposal* | 427,911 | 2.0966 | 6.7903 | 0.0000 | 50.0000 |
| *lnOutput* | 455,924 | 8.3816 | 1.7430 | -2.3026 | 20.0301 |
| Independent  variables | *ICT_Capital* | 5,100 | 0.6552 | 1.5617 | 0.0000 | 55.5512 |
| *ICT_Service* | 5,128 | 10.2906 | 17.7854 | 0.0000 | 99.9915 |
| [Enterprise](http://www.youdao.com/w/enterprise characteristic/" \l "keyfrom=E2Ctranslation)  [characteristic](http://www.youdao.com/w/enterprise characteristic/" \l "keyfrom=E2Ctranslation) | *lnSize* | 449,428 | 5.4502 | 1.1459 | 2.3026 | 12.2009 |
| *lnAge* | 455,927 | 2.3299 | 0.8482 | 0.0000 | 7.6059 |
| *Leverage* | 455,927 | 0.5798 | 0.2567 | 0.1121 | 1.0000 |
| *FDI* | 455,927 | 0.2107 | 0.4078 | 0.0000 | 1.0000 |
| *SOE* | 455,927 | 0.1049 | 0.3064 | 0.0000 | 1.0000 |
| *Export* | 455,927 | 0.2726 | 0.4453 | 0.0000 | 1.0000 |
| *lnKL* | 449,328 | 4.3217 | 1.3672 | -6.7452 | 14.5032 |
| Regional  characteristic | *GDP_Target* | 329 | 10.1444 | 1.4065 | 7.0000 | 15.0000 |
| *lnER* | 329 | 4.3215 | 1.0713 | 0.0000 | 7.2564 |
| *Innovation* | 4,629 | 58.2139 | 24.7032 | 1.0240 | 100.0000 |
| Industry  characteristics | *Industry_Open* | 305 | 0.1557 | 0.1532 | 0.0045 | 0.6814 |
| *Industry_Size* | 305 | 311.3494 | 198.0912 | 128.9000 | 1397.3500 |
| *Industry_Profit* | 305 | 0.0597 | 0.0278 | -0.0443 | 0.1674 |
| Technical  factors | *Product_Inno* | 264,198 | 3.8916 | 14.8079 | 0.0000 | 100.0000 |
| *TFP* | 210,113 | 0.7345 | 0.4866 | 0.1012 | 2.0142 |
| *GTFP* | 209,532 | 0.7292 | 0.4866 | 0.1022 | 2.0123 |
| *Technology_Up1* | 455,927 | 0.5047 | 0.5000 | 0.0000 | 1.0000 |
| *Technology_Up2* | 451,790 | 0.5998 | 0.4899 | 0.0000 | 1.0000 |

*Notes: The classification of variables and their meanings are consistent with those in Table 1.Technology_Up1and Technology_Up2 ref*er to the [dummy variable](http://www.youdao.com/w/dummy%20variable/#keyfrom=E2Ctranslation)s of pollution treatment technology and water-saving production technology, respectively.


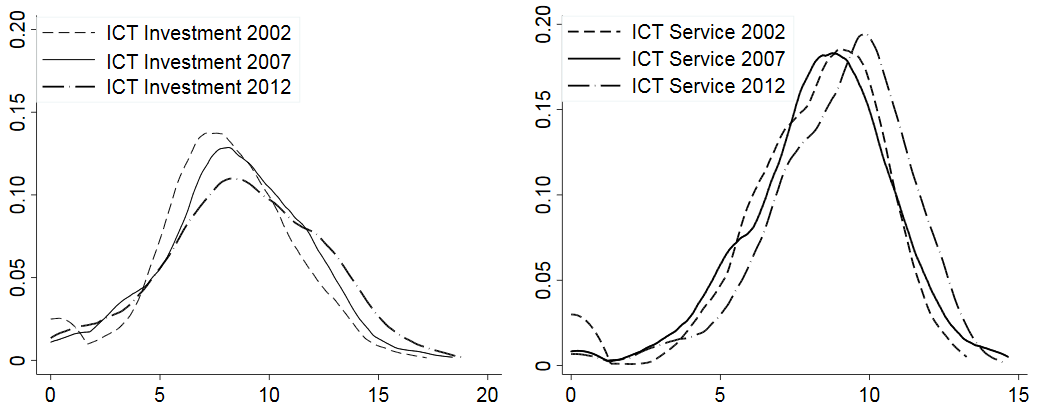


**Figure A. Kernel density distribution of ICT investment and ICT services**
